# Supplementary material for: Diversity of Parasitic Diarrhea Associated with Buxtonella Sulcata in Cattle and Buffalo Calves with Control of Buxtonellosis
Source: PubMed Central journal article supplement (PMC6562938; doi:10.3390/ani9050259), 2019-05-21
Supplement: animals-09-00259-s001.pdf [file animals-09-00259-s001.pdf]

### Supplementary data

Table S1. Species-wise prevalence rate of *Eimeria* spp. in cattle and buffalo calves

| Age groups                     | Species      | Prevalence of <i>Eimeria</i> spp. |                   |                         |                       |                         | P- value |
|--------------------------------|--------------|-----------------------------------|-------------------|-------------------------|-----------------------|-------------------------|----------|
|                                |              | <i>E. bovis</i>                   | <i>E. zurenii</i> | <i>E. ellipsoidalis</i> | <i>E. alabamensis</i> | <i>E. bukidnonensis</i> |          |
| Suckling calves (1d-60d)       | Cattle (70)  | 26 (37.14%)                       | 26 (37.14%)       | 23(32.86%)              | 21 (30%)              | 16 (22.86%)             | 0.595    |
|                                | Buffalo (49) | 20 (40.82%)                       | 16 (32.65%)       | 12 (24.49%)             | 12 (24.49%)           | 7 (14.29%)              |          |
| Post weaning calves (below 6m) | Cattle (63)  | 18 (28.57%)                       | 18 (28.57%)       | 16 (25.40%)             | 14 (22.22%)           | 11 (17.46%)             | 0.810    |
|                                | Buffalo (42) | 14 (33.33%)                       | 11 (26.19%)       | 8 (19.04%)              | 8 (19.04%)            | 5 (11.90%)              |          |
| Total                          | 224          | 78 (34.82%)                       | 71 (31.69%)       | 59 (26.34%)             | 55(24.55 %)           | 39 (17.41%)             |          |

\*P-value > 0.05 is non-significant (NS)

Table S2. Prevalence of internal parasites in diarrheic calves according to the types of infections

| Type of Parasites           | No. of Mono-infections | No. of mixed infections |                   |                             |                     |                      |
|-----------------------------|------------------------|-------------------------|-------------------|-----------------------------|---------------------|----------------------|
|                             |                        | <i>Eimeria</i> spp.     | <i>B. sulcata</i> | <i>Cryptosporidium</i> spp. | <i>T. vitulorum</i> | <i>Moneizia</i> spp. |
| <i>Eimeria</i> spp.         | 37 (16.51%)            | -                       | 21 (9.38%)        | 5 (2.23%)                   | 9 (4.02)            | 6 (2.68%)            |
| <i>B.sulcata</i>            | 35 (15.62%)            |                         | 21 (9.38%)        | 3 (1.34%)                   | 12(1.09%)           | 1 (0.45%)            |
| <i>Cryptosporidium</i> spp. | 10 (4.46%)             | 5 (2.23%)               | 3 (1.34%)         | -                           | -                   | -                    |

|                      |           |           |           |   |            |
|----------------------|-----------|-----------|-----------|---|------------|
| <i>T. vitulorum</i>  | 17(7.59%) | 9 (4.02)  | 12(5.36%) | - | 5 (2.23%)  |
| <i>Moneizia</i> spp. | 1(0.45%)  | 6 (2.68%) | 1 (0.45%) | - | 5(2.23%) - |

**Table S3. Prevalence rate of parasitic diarrhea in relation to gender**

| Internal Parasites          | Sex    | Cow calves           |       |                          |      | Buffalo calves      |      |                         |       | <i>P</i> -value* |
|-----------------------------|--------|----------------------|-------|--------------------------|------|---------------------|------|-------------------------|-------|------------------|
|                             |        | Suckling calves (70) |       | Post weaning calves (63) |      | Suckling calves(49) |      | Post weaning calves(42) |       |                  |
|                             |        | No.                  | %     | No.                      | %    | No.                 | %    | No.                     | %     |                  |
| <i>Eimeria</i> spp.         | Male   | 16                   | 22.85 | 11                       | 17.4 | 12                  | 24.4 | 9                       | 21.43 | 0.822            |
|                             | Female | 10                   | 14.29 | 7                        | 11.1 | 8                   | 16.3 | 5                       | 11.90 |                  |
| <i>Buxtonella sulcata</i>   | Male   | 15                   | 21.43 | 13                       | 20.6 | 11                  | 22.4 | 7                       | 16.67 | 0.913            |
|                             | Female | 8                    | 11.43 | 6                        | 9.52 | 7                   | 14.2 | 5                       | 11.90 |                  |
| <i>Cryptosporidium</i> spp. | Male   | 3                    | 4.29  | 1                        | 1.59 | 2                   | 4.08 | 1                       | 2.38  | 0.706            |
|                             | Female | 4                    | 5.71  | 2                        | 3.17 | 3                   | 6.12 | 2                       | 4.76  |                  |
| <i>Toxocara vitulorum</i>   | Male   | 5                    | 7.14  | 7                        | 11.1 | 2                   | 4.08 | 3                       | 7.14  | 0.459            |
|                             | Female | 9                    | 12.86 | 8                        | 12.7 | 4                   | 8.16 | 5                       | 11.90 |                  |
| <i>Moneizia</i> spp.        | Male   | -                    | -     | 5                        | 7.94 | -                   | -    | 3                       | 7.14  | No value         |
|                             | Female | -                    | -     | 3                        | 4.76 | -                   | -    | 2                       | 4.76  |                  |

\*P-value > 0.05 is non-significant (NS)

**Table S4. Prevalence rate of parasitic diarrhea in relation to housing system**

| Internal Parasites          | Housing system | Cow calves          |       |                          |      | Buffalo calves      |      |                         |       | P-value* |
|-----------------------------|----------------|---------------------|-------|--------------------------|------|---------------------|------|-------------------------|-------|----------|
|                             |                | Suckling calves(70) |       | Post weaning calves (63) |      | Suckling calves(49) |      | Post weaning calves(42) |       |          |
|                             |                | No.                 | %     | No.                      | %    | No.                 | %    | No.                     | %     |          |
| <i>Eimeria</i> spp.         | Paved          | 10                  | 14.29 | 7                        | 11.1 | 8                   | 16.3 | 5                       | 11.90 | 0.432    |
|                             | Dirt yard      | 16                  | 22.86 | 11                       | 17.4 | 12                  | 24.4 | 9                       | 21.43 |          |
| <i>Buxtonella sulcata</i>   | Paved          | 3                   | 4.29  | 6                        | 9.52 | 7                   | 14.2 | 4                       | 9.52  | 0.749    |
|                             | Dirt yard      | 15                  | 21.43 | 13                       | 20.6 | 11                  | 22.4 | 8                       | 19.05 |          |
| <i>Cryptosporidium</i> spp. | Paved          | 2                   | 2.86  | 1                        | 1.59 | 2                   | 4.08 | 1                       | 2.38  | 0.923    |
|                             | Dirt yard      | 5                   | 7.14  | 2                        | 3.17 | 3                   | 6.12 | 2                       | 4.76  |          |
| <i>Toxocara vitulorum</i>   | Paved          | 6                   | 8.57  | 6                        | 9.52 | 2                   | 4.08 | 3                       | 7.14  | 0.924    |
|                             | Dirt yard      | 8                   | 11.43 | 9                        | 14.2 | 4                   | 8.16 | 5                       | 11.90 |          |
|                             | Paved          | -                   | -     | 4                        | 6.35 | -                   | -    | 2                       | 4.76  | No value |

|                      |           |   |   |   |      |   |   |   |      |
|----------------------|-----------|---|---|---|------|---|---|---|------|
| <i>Moneizia</i> spp. | Dirt yard | - | - | 4 | 6.35 | - | - | 3 | 7.14 |
|----------------------|-----------|---|---|---|------|---|---|---|------|

\**P*-value > 0.05 is non-significant (NS)

**Table S5. Seasonal prevalence rate of internal parasites among diarrheic calves**

| Internal Parasites        | Season | Cow calves          |       |                          |      | Buffalo calves      |       |                         |       | Total %     | <i>P</i> -value* |
|---------------------------|--------|---------------------|-------|--------------------------|------|---------------------|-------|-------------------------|-------|-------------|------------------|
|                           |        | Suckling calves(70) |       | Post weaning calves (63) |      | Suckling calves(49) |       | Post weaning calves(42) |       |             |                  |
|                           |        | No.                 | %     | No.                      | %    | No.                 | %     | No.                     | %     |             |                  |
| <i>Eimeria</i> spp.       | Winter | 4                   | 5.71  | 4                        | 6.35 | 3                   | 6.12  | 2                       | 4.76  | 13 (5.80%)  | 0.924            |
|                           | Spring | 9                   | 12.86 | 5                        | 7.94 | 7                   | 14.29 | 6                       | 14.29 | 27 (12.05%) |                  |
|                           | Summer | 5                   | 7.14  | 4                        | 6.35 | 4                   | 8.61  | 3                       | 7.14  | 16 (7.14%)  |                  |
|                           | Autumn | 8                   | 11.43 | 5                        | 7.94 | 6                   | 12.24 | 3                       | 7.14  | 22 (9.82%)  |                  |
| <i>Buxtonella sulcata</i> | Winter | 5                   | 7.14  | 5                        | 7.94 | 3                   | 6.12  | 3                       | 7.14  | 16 (7.14%)  | 0.841            |
|                           | Spring | 8                   | 11.43 | 6                        | 9.52 | 7                   | 14.29 | 4                       | 9.52  | 25 (11.16%) |                  |

|                             |        |   |      |   |      |   |      |   |      |            |          |
|-----------------------------|--------|---|------|---|------|---|------|---|------|------------|----------|
|                             | Summer | 4 | 5.71 | 3 | 4.76 | 3 | 6.12 | 2 | 4.76 | 12 (5.36%) |          |
|                             | Autumn | 6 | 8.57 | 5 | 7.94 | 5 | 10.2 | 3 | 7.14 | 19 (8.48%) |          |
|                             | Winter | 2 | 2.86 | 0 | 0    | 1 | 2.04 | 1 | 2.38 | 4 (1.79%)  |          |
| <i>Cryptosporidium</i> spp. | Spring | 2 | 2.86 | 2 | 3.17 | 1 | 2.04 | 1 | 2.38 | 6 (2.68%)  |          |
|                             | Summer | 1 | 1.43 | 0 | 0    | 1 | 2.04 | 0 | 0    | 2 (0.89%)  | 0.437    |
|                             | Autumn | 2 | 2.86 | 1 | 1.59 | 2 | 4.08 | 1 | 2.38 | 6 (2.68%)  |          |
|                             | Winter | 5 | 7.14 | 5 | 7.94 | 3 | 6.12 | 2 | 4.76 | 15 (6.70%) |          |
| <i>Toxocara vitulorum</i>   | Spring | 3 | 4.29 | 4 | 6.35 | 1 | 2.04 | 1 | 2.38 | 9 (4.02%)  | 0.922    |
|                             | Summer | 2 | 2.86 | 1 | 1.59 | 1 | 2.04 | 1 | 2.38 | 5 (2.23%)  |          |
|                             | Autumn | 3 | 4.29 | 2 | 3.17 | 1 | 2.04 | 1 | 2.38 | 8 (3.57%)  |          |
|                             | Winter | 0 | 0    | 3 | 4.76 | 0 | 0    | 3 | 7.14 | 6 (2.68%)  |          |
| <i>Moneizia</i> spp.        | Spring | 0 | 0    | 3 | 4.76 | 0 | 0    | 3 | 7.14 | 6(2.68%)   | No value |
|                             | Summer | 0 | 0    | 2 | 3.17 | 0 | 0    | 1 | 2.38 | 3 (1.34%)  |          |
|                             | Autumn | 0 | 0    | 2 | 3.17 | 0 | 0    | 2 | 4.76 | 4 (1.79%)  |          |
|                             | Winter | 0 | 0    | 3 | 4.76 | 0 | 0    | 3 | 7.14 | 6 (2.68%)  |          |

\**P*-value > 0.05 is non-significant (NS)

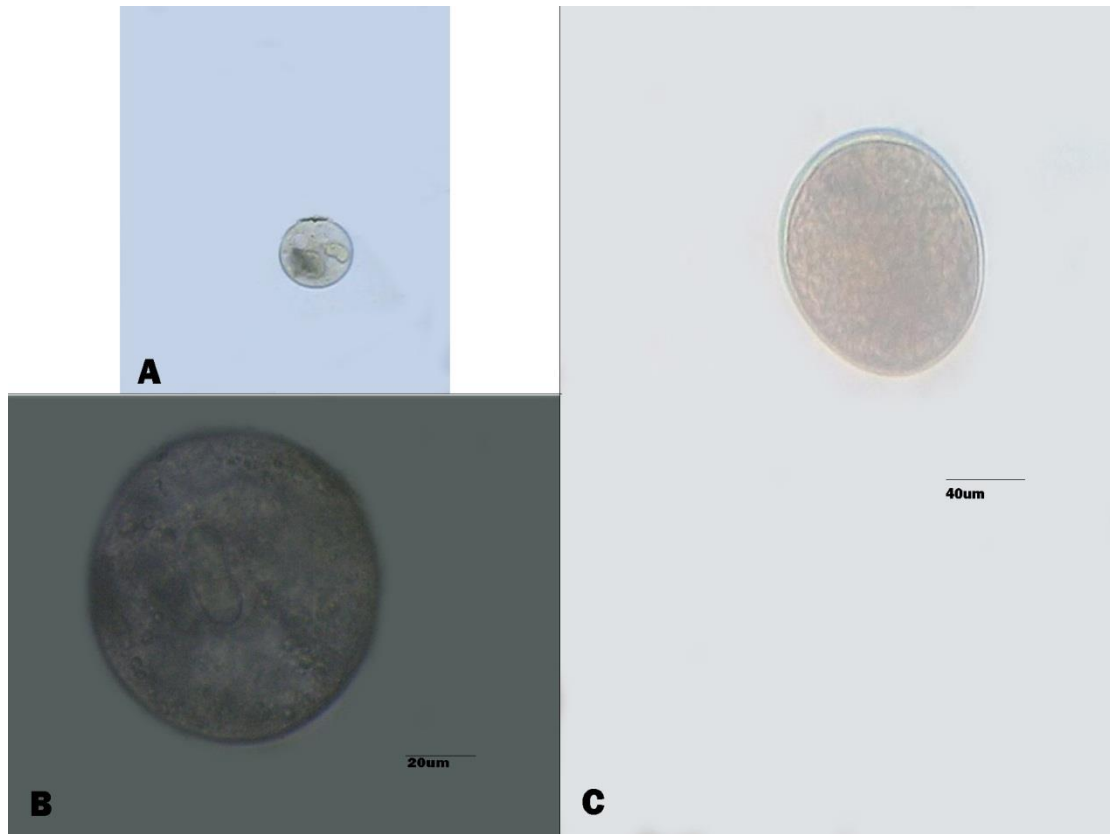

Figure.S1. *Buxtonella sulcate*. A. Trophozoite form (low magnification). B. Trophozoite (Higher magnification). C. Cyst form

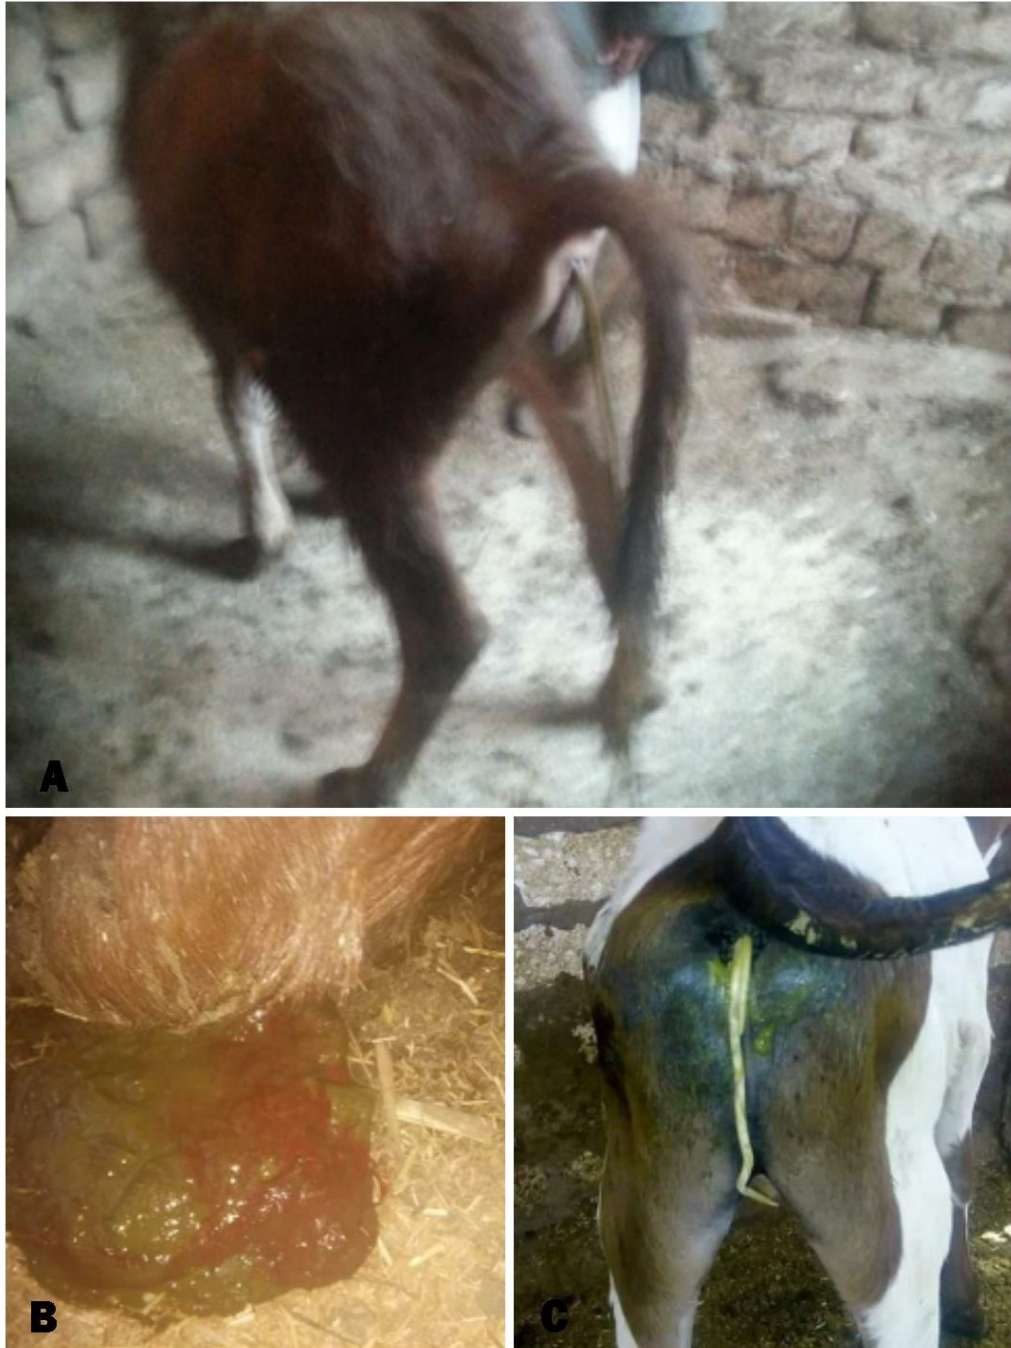

Figure. S2. Calves suffering from diarrhea, (A) Arched back position due to *B. sulcate*, (B) Bloody diarrhea due to *Eimeria* spp, (C) *Toxocara vitulorum* protruded from anal opening in calf
